# Supplementary material for: Chronic exposure to parabens promotes non-alcoholic fatty liver disease in association with the changes of the gut microbiota and lipid metabolism
Source: Royal Society of Chemistry journal article supplement (doi:10.1039/d3fo04347a), 2024-01-01
Supplement: d3fo04347a8.pdf [file d3fo04347a8.pdf]

**Chronic exposure to paraben promotes nonalcoholic fatty liver disease in  
association with the changes of gut microbiota and lipid metabolism**

Yilin Ren<sup>1‡</sup>, Xinyi Shi<sup>1‡</sup>, Jing Mu<sup>1</sup>, Shenyin Liu<sup>1</sup>, Xin Qian<sup>1</sup>, Wenlong Pei<sup>1</sup>, Shanhong  
Ni<sup>1</sup>, Zhengduo Zhang<sup>1</sup>, Lei Li<sup>1, 2\*</sup>, Zhan Zhang<sup>1, 2\*</sup>

Supplementary data

**Figure S1. The effects of parabens exposure on intestine.** The weight of (A) heart, (B) spleen and (C) kidney. The length of small intestine (D) and colon (E). (F) Representative histopathological observation of colon (4  $\mu\text{m}$ ). The colon was stained with hematoxylin and eosin (H&E) and observed using optical microscopy, scale bar: 100  $\mu\text{m}$ . \* $P < 0.05$ , compared with the respective control; # $P < 0.05$ , ## $P < 0.01$  compared with the ND group.

**Figure S2. Effect of Mep or EtP on inflammation in mice fed with ND or HFD.** Serum levels of (A) alanine transaminase (ALT) and (B) aspartate aminotransferase (AST). The relative expression of inflammatory genes, including (C) *IL1 $\beta$* , (D) *IL6*, (E) *TNF $\alpha$* , (F) *Adgre1* and (G) *MCP-1*. Data were presented as the mean  $\pm$  SEM and analyzed by ordinary one-way ANOVA with Tukey's multiple comparisons. \* $P < 0.05$ , \*\* $P < 0.01$ , compared with the respective control; # $P < 0.05$ , ## $P < 0.01$ , ### $P < 0.001$ , compared with the ND group.

**Figure S3. The effects of parabens exposure on the metabolic profile in HFD-fed mice.** (A) The projection to latent structures discriminant analysis (PLS-DA) score plot among control, Mep and EtP groups fed with ND or HFD. (B) The numbers of significantly altered metabolites among control, Mep and EtP groups fed with ND or HFD. Heat map analysis of differential metabolites involved in enriched pathways after exposure to MeP (C) and EtP (D). Red color represents an upregulation of the metabolite while green color represents a downregulation. Enrichment of pathways was indicated by coloured bars on the left.

**Figure S4. Taxonomic differences of fecal microbiota at the genus level. (A)**

Taxonomic differences between ND and HFD groups. Taxonomic differences between control and Mep (B) or EtP (C) groups fed with ND at the genus level. Taxonomic differences between control and Mep (E) or EtP (F) group fed with HFD at the genus level. The statistical difference was analyzed by Wilcoxon rank-sum test.  $*P < 0.05$ ,  $**P < 0.01$ ,  $***P < 0.001$ , compared with the respective control.

**Figure. S5. Predicted functions of the metagenome from 16S rRNA sequencing.**

Functional annotation of the predicted metagenome based on 16S rRNA data was performed by PICRUSt 2 and STAMP was used to identify significant pathways. (A) The numbers of significantly enriched pathways among control, MeP and EtP groups fed with ND or HFD. (B) The common enriched pathways between ND and HFD fed mice after MeP exposure. (C) The common enriched pathways between MeP and EtP exposure in HFD fed mice. Enriched pathways with same trend in ND (D) and HFD (E) fed mice after MeP exposure. Enriched pathways with same trend in HFD fed mice after MeP (F) and EtP (G) exposure. Differences between groups were determined using the Welch's t-test.

**Figure. S6. Association analysis of genera with serum chemistry or metabolites.**

Association analysis of differential genera with serum chemistry or metabolites in AA metabolism pathway between HFD and HFD+ MeP (A) or (B) HFD+ EtP groups. Significant correlations are denoted by stars ( $*P < 0.05$ ;  $**P < 0.01$ , Spearman test).

Higher taxonomy of genera (phyla) and superpathways of metabolites were indicated by coloured bars.

**Supplementary Table 1. Diet composition**

| Diet Formulas       | Normal diet (ND) | High fat diet (HFD) |
|---------------------|------------------|---------------------|
|                     | kcal%            | kcal%               |
| Fat                 | 10.00            | 60.00               |
| Carbohydrate        | 70.00            | 20.00               |
| Protein             | 20.00            | 20.00               |
| Total               | 100.00           | 100.00              |
| Ingredient          | g/Kg             | g/Kg                |
| Casein              | 189.56           | 258.45              |
| L-Cystine           | 2.84             | 3.88                |
| Corn Starch         | 479.78           | 0.00                |
| Maltodextrin 10     | 118.48           | 161.53              |
| Sucrose             | 69.00            | 94.08               |
| Cellulose, BW200    | 47.39            | 64.61               |
| Soybean Oil         | 23.70            | 32.30               |
| Lard                | 18.96            | 316.60              |
| Mineral Mix S10026B | 47.39            | 64.61               |
| Vitamin Mix V10001C | 0.95             | 1.29                |
| Choline Bitartrate  | 1.90             | 2.58                |
| FD&C Red Dye #40    | 0.00             | 0.00                |
| FD&C Yellow Dye #5  | 0.04             | 0.00                |
| FD&C Blue Dye #1    | 0.01             | 0.06                |

**Supplementary Table 2. Primer sequence**

| Gene name                      | Forward sequence           | Reverse sequence      |
|--------------------------------|----------------------------|-----------------------|
| <i>mGAPDH</i>                  | AACTTTGGCATTGTGGAAGG       | GGATGCAGGGATGATGTTCT  |
| <i>mIL1<math>\beta</math></i>  | TAGACA ACTGCACTACAGGCTCCGA | GGGTCCGACAGCACGAGGCT  |
| <i>mIL6</i>                    | ACAAAGCCAGAGTCCTTCAGA      | GGTCCTTAGCCACTCCTTCTG |
| <i>mTNF<math>\alpha</math></i> | GCTGAGCTCAAACCCTGGTA       | AGTACTTGGGCAGATTGACCT |
| <i>mAdgre1</i>                 | ATACCCTCCAGCACATCCAG       | AGTTTGCCATCCGGTTACAG  |
| <i>mMcp-1</i>                  | TCCAATGAGTAGGCTGGAG        | TCTGGACCCATTTCCTTCTTG |
| <i>mGlut2</i>                  | TCCCTTGTTTCATGGTTGCT       | CCCAAGGAAGTCCGCAATGT  |
| <i>mPfkfb1</i>                 | ATGAGCTGCCCTATCTCAAGT      | GTCCCGGTGTGTGTTACAG   |
| <i>mPfk1</i>                   | ACGTGAAGGATCTGGTGGTTC      | ATTCGGTCGAAGGCTGAAGG  |
| <i>mPfk2</i>                   | AGCATTCATACCTTGGGCAT       | CCATGAAGAGCATCATGCAG  |
| <i>mAldoA</i>                  | CAGATGAGTCCACCGGAAGC       | AATGCAGGGATTACACGGT   |
| <i>mPdha1</i>                  | TCATTTGCAAAATTACGGGA       | AAGATGCTTGCCGCTGTATC  |
| <i>mPdk1</i>                   | TTACTCAGTGGAACACCGCC       | GTTTATCCCCGATTCAGGT   |
| <i>mCs</i>                     | GGACAATTTTCCAACCAATCTGC    | TCGGTTCATTCCCTCTGCATA |
| <i>mIdh3g</i>                  | GGTGCTGCAAAGGCAATGC        | TATGCCGCCCACCATACTTAG |
| <i>mMe2</i>                    | GGCAGGTCAAGGTACAAGGA       | CTGCTTGCTGCACCACCT    |
| <i>mFbp1</i>                   | GCACAGCTCTATGGTATCGCT      | CACAGGTAGCGTAGGACGAC  |
| <i>mFbp2</i>                   | ACAGAAAGACCACGGAGGATG      | TGTCCTGTGGAAAGAGCGAC  |
| <i>mCD36</i>                   | GCTGTGTTTGGAGGCATTCT       | TGGGTTTTGCACATCAAAGA  |
| <i>mAcaa1a</i>                 | CCTGACTCCTATGGGGATGA       | CCCTTGTCATCCAGGACAGT  |

|                                 |                         |                         |
|---------------------------------|-------------------------|-------------------------|
| <i>mCpt1a</i>                   | CCAGGCTACAGTGGGACATT    | AAGGAATGCAGGTCCACATC    |
| <i>mAdrp</i>                    | CTGTCTACCAAGCTCTGCTC    | CGATGCTTCTCTTCCACTCC    |
| <i>mPPAR<math>\gamma</math></i> | GATGGAAGACCACTCGCATT    | CAACCATTGGGTCAGCTCTT    |
| <i>mSrebf1</i>                  | TACTTCTTGTGGCCCGTACC    | TCAGGTCATGTTGGAAACCA    |
| <i>mAcaca</i>                   | GAGAGGGGTCAAGTCCTTCC    | ACATCCACTTCCACACACGA    |
| <i>mFasn</i>                    | CCCTTGATGAAGAGGGATCA    | CAAGGCGTTAGGGTTGACAT    |
| <i>mCYP4A14</i>                 | GGAGCAATATACGAGTCCTGC   | CAGAGTCCGCCATGATTTTGA   |
| <i>mCYP2J9</i>                  | CAAGAGGAGGCTCACTACCTT   | TGATGACTCCAAACACATGGC   |
| <i>mCYP2C50</i>                 | ACTGTGGTGTTCATGGATATG   | GAGAAGCGCCTTGTGTTTTTC   |
| <i>mEphx2</i>                   | ACCACTCATGGATGAAAGCTACA | TCAGGTAGATTGGCTCCACAG   |
| <i>mCyp4A30B</i>                | GTTACCAGGGTAGTGTCCAGT   | GCACTCTCAAGTAAATCAGGTGT |
| <i>mCYP2C67</i>                 | TGTAGTCTTGGTGCTTTGTCTG  | ACAATAGGCTGTGAGCCAAAATA |
| <i>hGAPDH</i>                   | ACAAC TTTGGTATCGTGGAAGG | GCCATCACGCCACAGTTTC     |
| <i>hAdrp</i>                    | TTGCAGTTGCCAATACCTATGC  | CCAGTCACAGTAGTCGTCACA   |
| <i>hCD36</i>                    | CTTTGGCTTAATGAGACTGGGAC | GCAACAAACATCACCACACCA   |
| <i>hCpt1a</i>                   | ATCAATCGGACTCTGGAAACGG  | TCAGGGAGTAGCGCATGGT     |
| <i>hPPAR<math>\gamma</math></i> | GATGCCAGCGACTTTGACTC    | ACCCACGTCATCTTCAGGGA    |
| <i>hSrebf1</i>                  | CGGAACCATCTTGGCAACAGT   | CGCTTCTCAATGGCGTTGT     |
| <i>hAcaca</i>                   | CATGCGGTCTATCCGTAGGTG   | GTGTGACCATGACAACGAATCT  |
| <i>hFasn</i>                    | ACAGCGGGGAATGGGTACT     | GACTGGTACAACGAGCGGAT    |
| <i>hCYP4A11</i>                 | CCATCCCCATTGCACGACTT    | CAGGTAGACAAGCAGGTAGGG   |
| <i>hCYP2C8</i>                  | CATACTGACTTCCGTGCTACAT  | CTCCTGCACAAATTCGTTTTCC  |

|                |                        |                       |
|----------------|------------------------|-----------------------|
| <i>hCYP2J2</i> | GAGCTTAGAGGAACGCATTCAG | GAAATGAGGGTCAAAGGCTGT |
| <i>hEphx2</i>  | GACATCGGGGCTAATCTGAAG  | GGCTTTACTGTCACGTACCCA |

---

*m*, *Mus musculus*; *h*, *Homo sapiens*.
