# Supplementary figures and images for: Chronic exposure to parabens promotes non-alcoholic fatty liver disease in association with the changes of the gut microbiota and lipid metabolism
Source: Royal Society of Chemistry journal article supplement (doi:10.1039/d3fo04347a), 2024-01-01

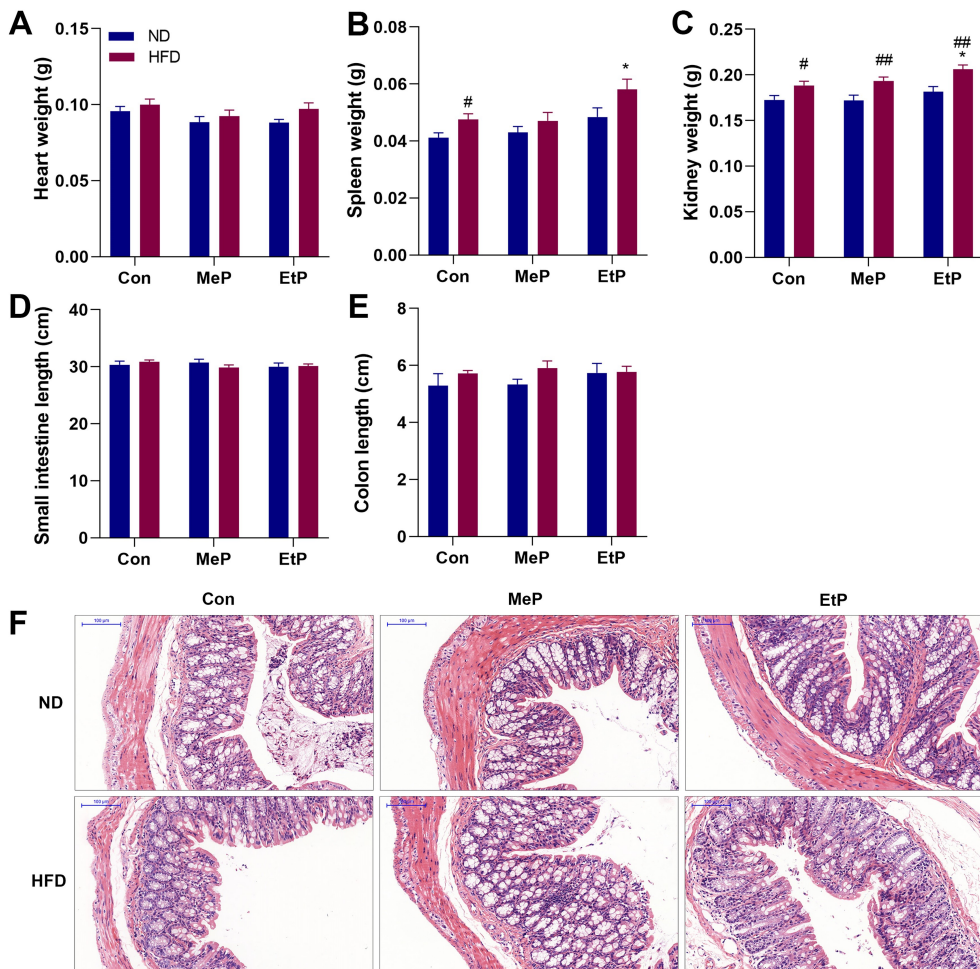

Supplement: d3fo04347a1.pdf [file d3fo04347a1.pdf]

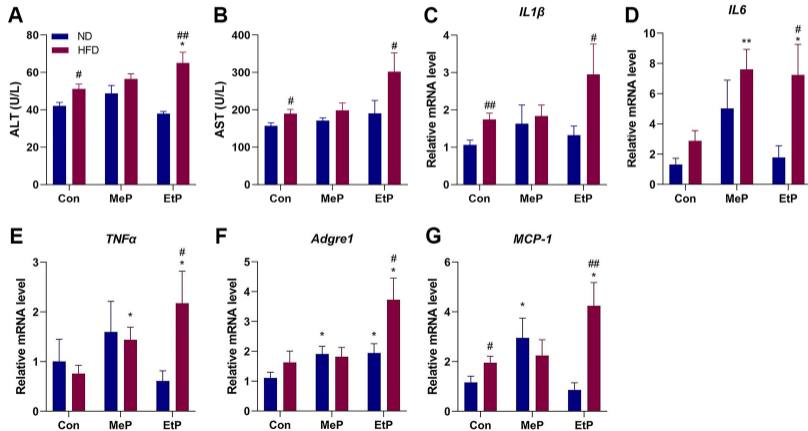

Supplement: d3fo04347a2.pdf [file d3fo04347a2.pdf]

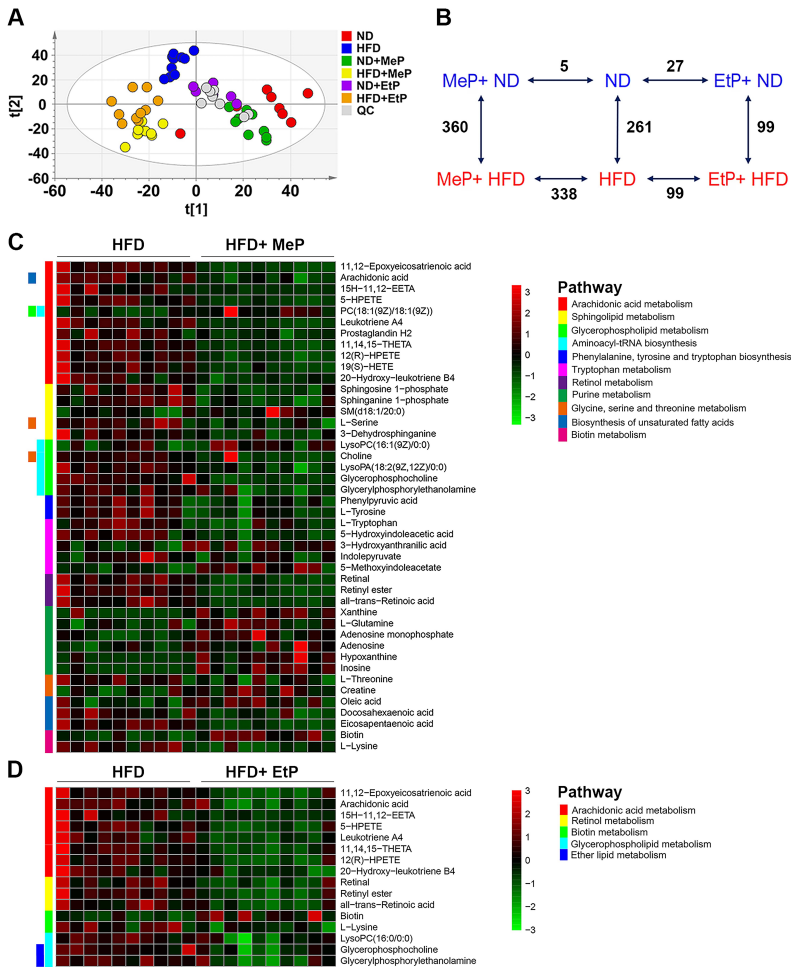

Supplement: d3fo04347a3.pdf [file d3fo04347a3.pdf]

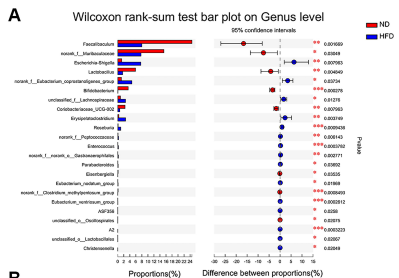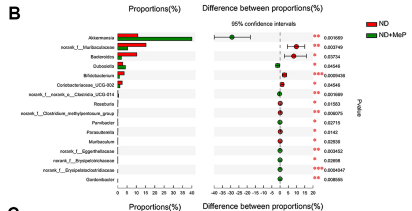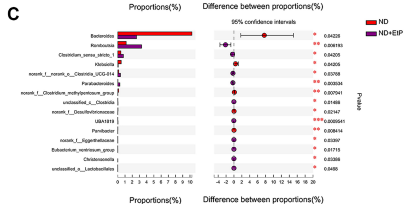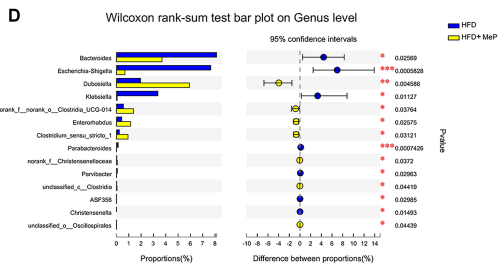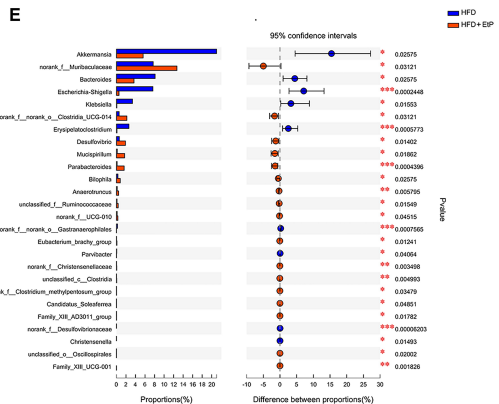

Supplement: d3fo04347a4.pdf [file d3fo04347a4.pdf]

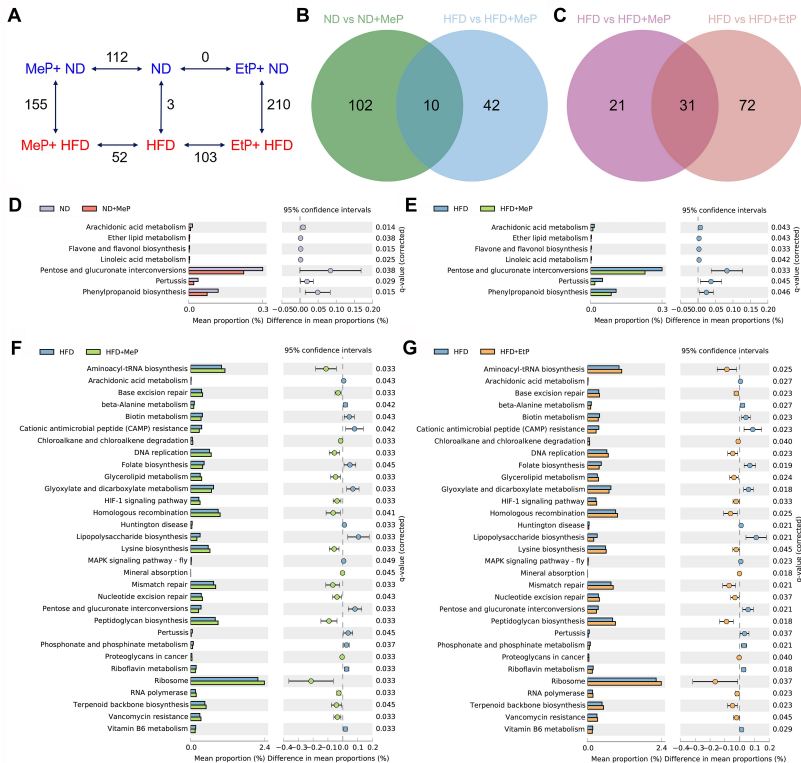

Supplement: d3fo04347a5.pdf [file d3fo04347a5.pdf]

**A**

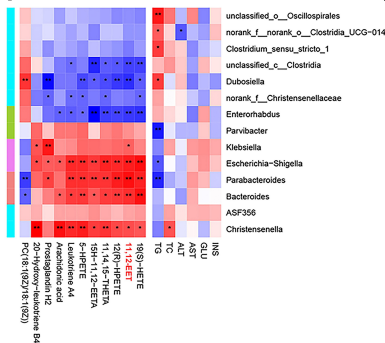

**B**

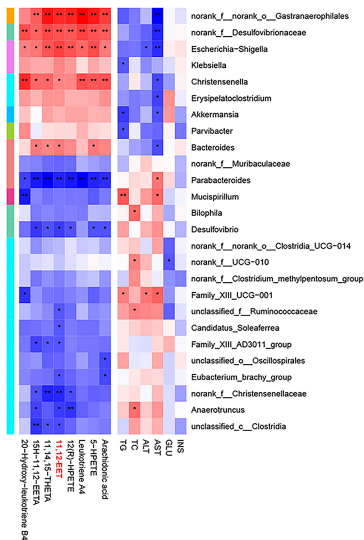

Supplement: d3fo04347a6.pdf [file d3fo04347a6.pdf]

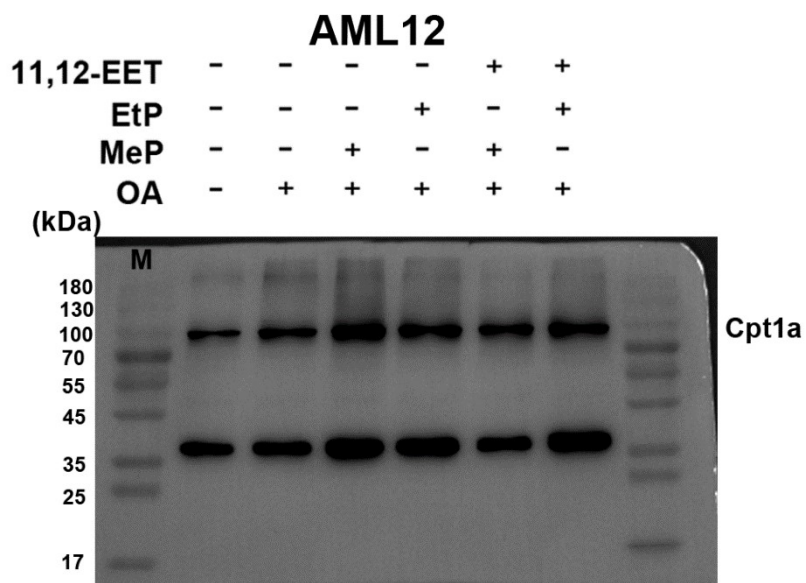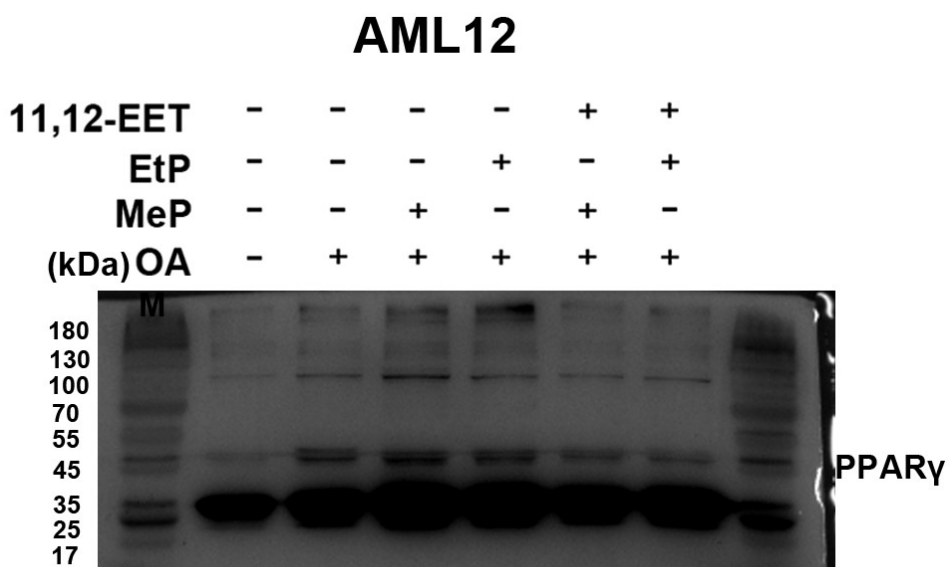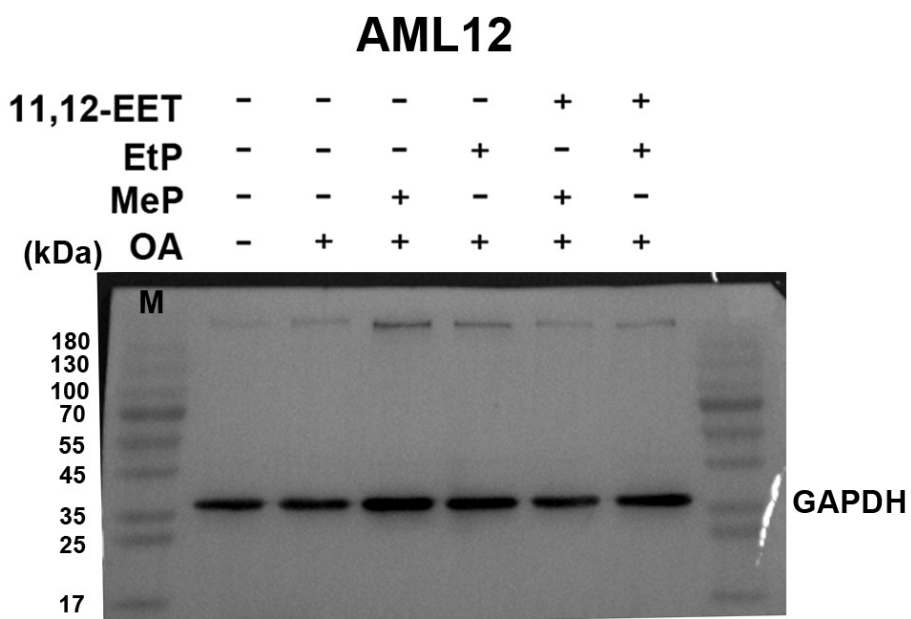

### HepG2

|           |   |   |   |   |   |   |
|-----------|---|---|---|---|---|---|
| 11,12-EET | - | - | - | - | + | + |
| EtP       | - | - | - | + | - | + |
| MeP       | - | - | + | - | + | - |
| (kDa) OA  | - | + | + | + | + | + |

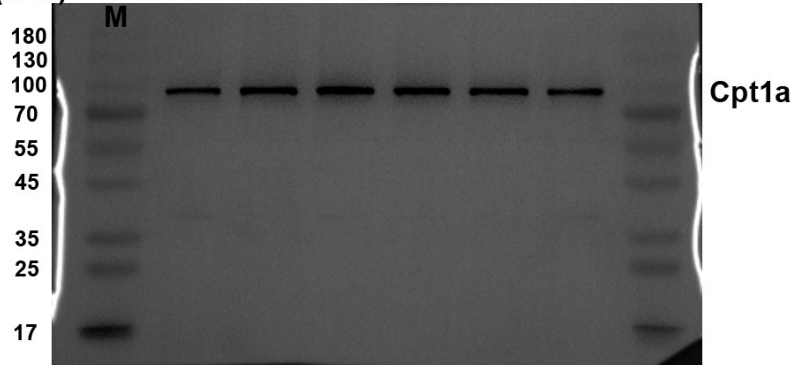

### HepG2

|           |   |   |   |   |   |   |
|-----------|---|---|---|---|---|---|
| 11,12-EET | - | - | - | - | + | + |
| EtP       | - | - | - | + | - | + |
| MeP       | - | - | + | - | + | - |
| (kDa) OA  | - | + | + | + | + | + |

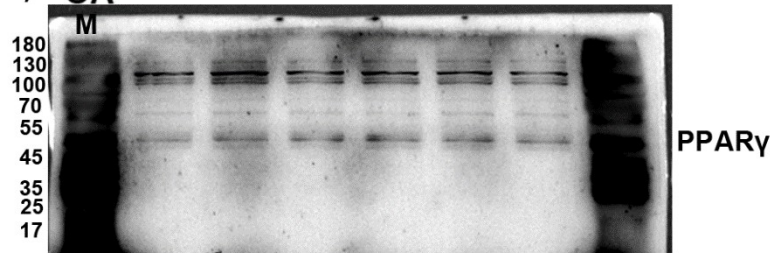

### HepG2

|           |   |   |   |   |   |   |
|-----------|---|---|---|---|---|---|
| 11,12-EET | - | - | - | - | + | + |
| EtP       | - | - | - | + | - | + |
| MeP       | - | - | + | - | + | - |
| (kDa) OA  | - | + | + | + | + | + |

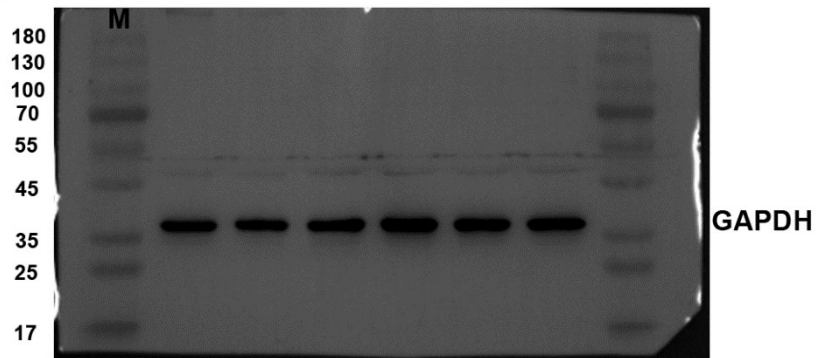

Supplement: d3fo04347a7.pdf [file d3fo04347a7.pdf]
